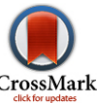

## Correction

# Correction: Bryophyte-Cyanobacteria Associations during Primary Succession in Recently Deglaciated Areas of Tierra del Fuego (Chile)

The *PLOS ONE* Staff

The following information is missing from the Funding section: MA-C benefited from a postdoctoral Juan de la Cierva grant of the Ministerio de Ciencia e Innovación of Spain.

There are errors in the Author Contributions. The correct contributions are: Performed the experiments: MA-C SPO ADLR MC MTDLC ROH. Analyzed the data: MA-C SPO NT. Carried out sampling field work: AP SPO TGAG. Selected field sites: DP RR LGS.

## Reference

1. Arróniz-Crespo M, Pérez-Ortega S, De los Ríos A, Green TGA, Ochoa-Hueso R, et al. (2014) Bryophyte-Cyanobacteria Associations during Primary Succession in Recently Deglaciated Areas of Tierra del Fuego (Chile). *PLoS ONE* 9(5): e96081. doi:10.1371/journal.pone.0096081

**Citation:** The *PLOS ONE* Staff (2014) Correction: Bryophyte-Cyanobacteria Associations during Primary Succession in Recently Deglaciated Areas of Tierra del Fuego (Chile). *PLoS ONE* 9(9): e108759. doi:10.1371/journal.pone.0108759

**Published:** September 18, 2014

**Copyright:** © 2014 The *PLOS ONE* Staff. This is an open-access article distributed under the terms of the Creative Commons Attribution License, which permits unrestricted use, distribution, and reproduction in any medium, provided the original author and source are credited.
